# Supplementary material for: Identification of berberine as a novel drug for the treatment of multiple myeloma via targeting UHRF1
Source: PubMed Central journal article supplement (PMC7098108; doi:10.1186/s12915-020-00766-8), 2020-03-25
Supplement: 12915_2020_766_MOESM1_ESM.pdf [file 12915_2020_766_MOESM1_ESM.pdf]

Additional file 1, Figure S1.

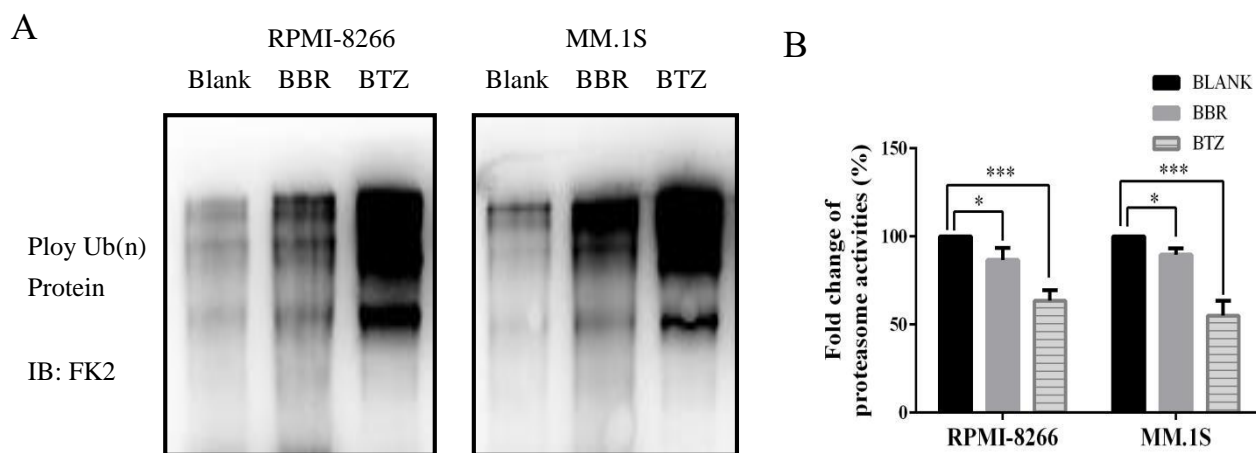

**Additional file 1, Figure S1. The effect of BBR and bortezomib on the proteasome activity and protein ubiquitination level in MM cells.**

A. RPMI-8266 and MM.1S cells were treated with DMSO, BBR, or BTZ for 3h, and protein lysates were analyzed for proteasome activity. Protein lysates from control, BBR- or BTZ-treated RPMI-8266, and MM.1S cells were subjected to IB with an anti-FK2 antibody.

B. Raw data were normalized to percent proteasome activity in control (as 100%) versus drug-treated cells (mean  $\pm$  SD; n=3; \*, P < 0.05; \*\*, P < 0.01; \*\*\*, P < 0.001 compared with BLANK).
