# Supplementary material for: Identification of berberine as a novel drug for the treatment of multiple myeloma via targeting UHRF1
Source: PubMed Central journal article supplement (PMC7098108; doi:10.1186/s12915-020-00766-8), 2020-03-25
Supplement: 12915_2020_766_MOESM5_ESM.pdf [file 12915_2020_766_MOESM5_ESM.pdf]

Additional file 5, Figure S2

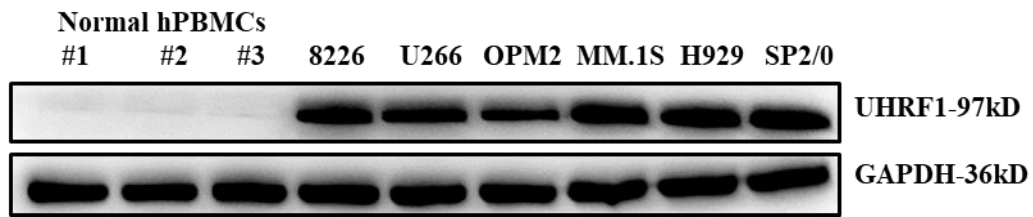

**Additional file 5, Figure S2. The UHRF1 protein expression in MM cell lines and normal hPBMCs.** Cell lysates MM cells and normal hPBMCs lysates were subjected to western blotting with anti-UHRF1 and anti-GAPDH antibodies. The protein levels of UHRF1 were higher in MM cells than normal hPBMCs.
