# Supplementary material for: Identification of berberine as a novel drug for the treatment of multiple myeloma via targeting UHRF1
Source: PubMed Central journal article supplement (PMC7098108; doi:10.1186/s12915-020-00766-8), 2020-03-25
Supplement: 12915_2020_766_MOESM7_ESM.pdf [file 12915_2020_766_MOESM7_ESM.pdf]

Additional file 7, Figure S3

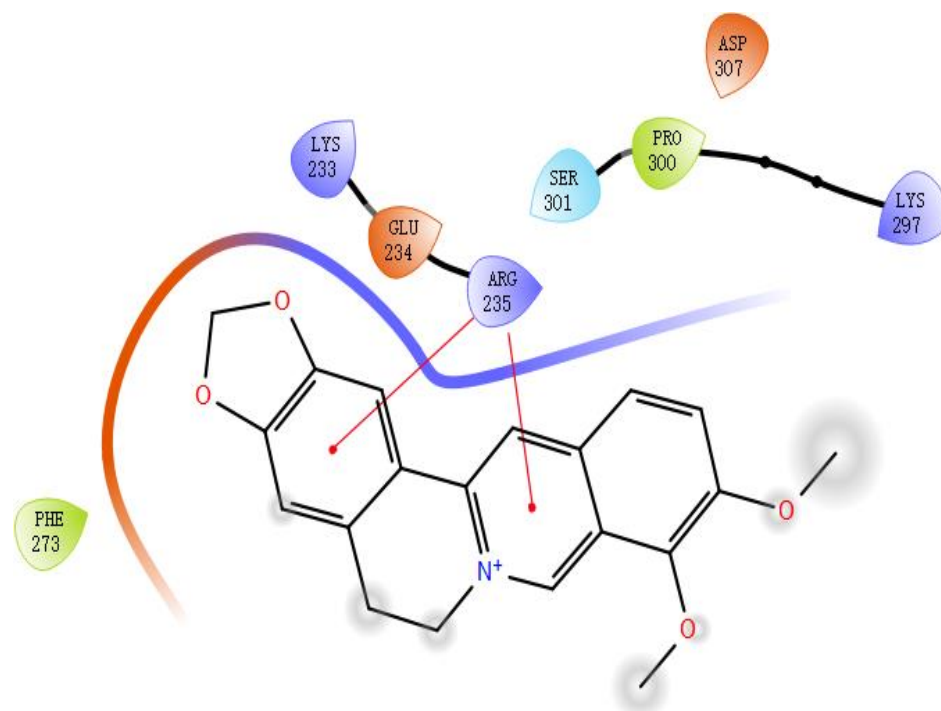

**Additional file 7, Figure S3. Zoom-in view of the "229-PDNPKERGFWYD-240" peptide and BBR in the stick representation, labeled by residue name and position.**
