# Supplementary material for: Identification of berberine as a novel drug for the treatment of multiple myeloma via targeting UHRF1
Source: PubMed Central journal article supplement (PMC7098108; doi:10.1186/s12915-020-00766-8), 2020-03-25
Supplement: 12915_2020_766_MOESM8_ESM.pdf [file 12915_2020_766_MOESM8_ESM.pdf]

Additional file 8, Figure S4.

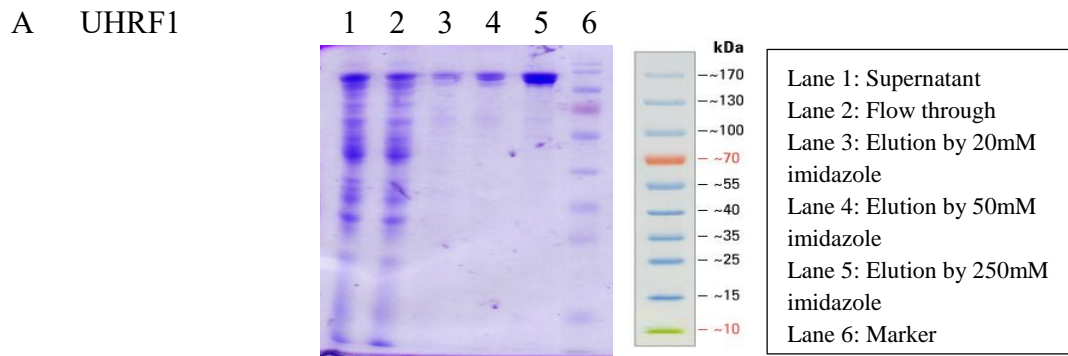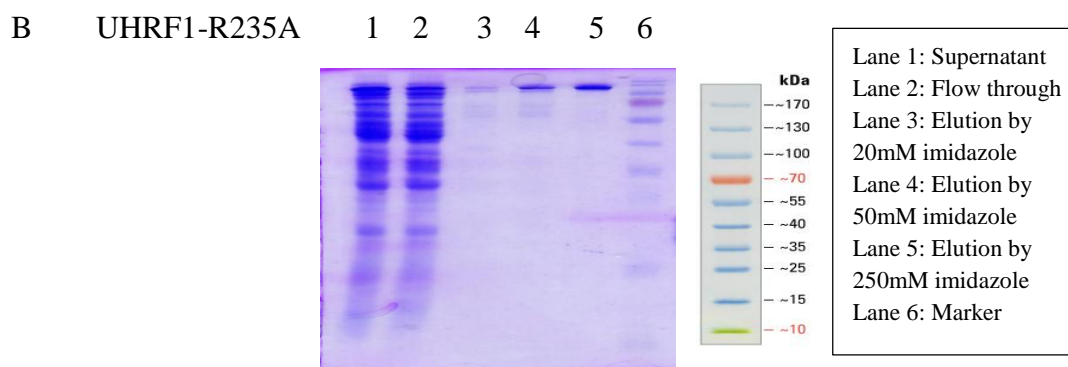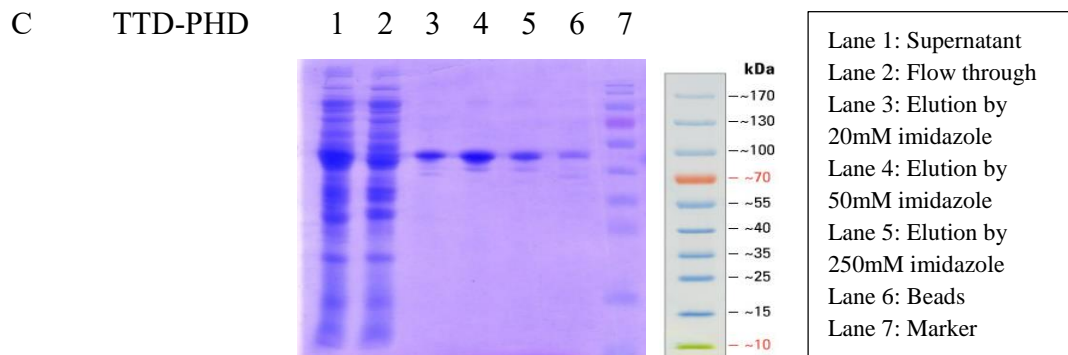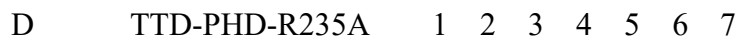

Lane 1: Marker  
 Lane 2: Supernatant  
 Lane 3: Flow through  
 Lane 4: Elution by 20mM imidazole  
 Lane 5: Elution by 50mM imidazole  
 Lane 6: Elution by 250mM imidazole

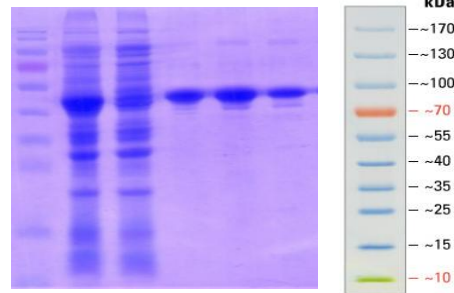

E NIRF

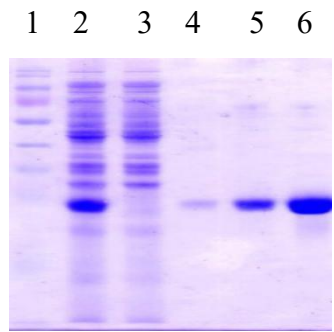

Lane1: Marker  
 Lane2: Supernatant  
 Lane3: Flow through  
 Lane4: Elution by 20mM imidazole  
 Lane5: Elution by 50mM imidazole  
 Lane6: Elution by 250mM imidazole

F PHD

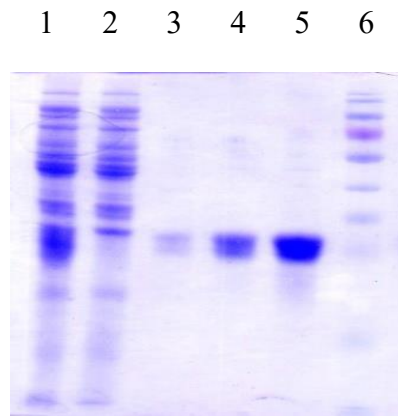

Lane 1: Supernatant  
 Lane 2: Flow through  
 Lane 3: Elution by 20mM imidazole  
 Lane 4: Elution by 50mM imidazole  
 Lane 5: Elution by 250mM imidazole  
 Lane 6: Marker

G SRA and RING

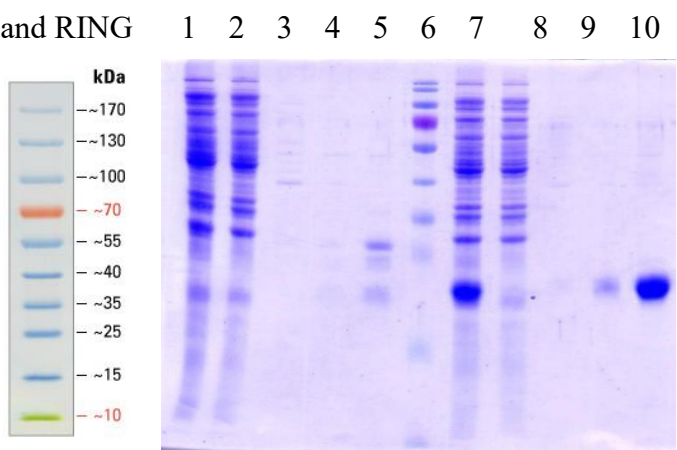

Lane1: SRA-Supernatant  
 Lane2: SRA-Flow through  
 Lane3: SRA-Elution by 20mM imidazole  
 Lane4: SRA-Elution by 50mM imidazole  
 Lane5: SRA-Elution by 250mM imidazole  
 Lane6: Marker  
 Lane7: RING-Supernatant  
 Lane8: RING-Flow through  
 Lane9: RING-Elution by 20mM imidazole  
 Lane10: RING-Elution by 50mM imidazole  
 Lane11: RING-Elution by 250mM imidazole

**Additional file 8, Figure S4. Proteins were purified from *E. coli* lysates overexpressing different domains of UHRF1.**

A. UHRF1. B. UHRF1-R235A. C. TTD-PHD. D. TTD-PHD-R235A. E. NIRF. F. PHD.

G. SRA and RING.
