# Supplementary material for: Identification of berberine as a novel drug for the treatment of multiple myeloma via targeting UHRF1
Source: PubMed Central journal article supplement (PMC7098108; doi:10.1186/s12915-020-00766-8), 2020-03-25
Supplement: 12915_2020_766_MOESM9_ESM.pdf [file 12915_2020_766_MOESM9_ESM.pdf]

Additional file 9, Figure S5

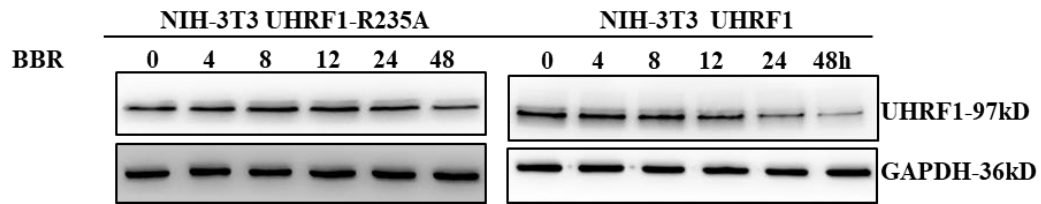

**Additional file 9, Figure S5. The effect of BBR on UHRF1 R235A and UHRF1 protein expression.** pFlag-CMV4-UHRF1 and pFlag-CMV4-UHRF1 R235A were transfected into NIH 3T3 cells, and treated with 25  $\mu$ M BBR for 0, 4, 8, 12, 24, and 48 h. Cells lysates were harvested and subjected to western blotting with the anti-flag and anti-GAPDH antibodies.
