# Supplementary material for: Identification of berberine as a novel drug for the treatment of multiple myeloma via targeting UHRF1
Source: PubMed Central journal article supplement (PMC7098108; doi:10.1186/s12915-020-00766-8), 2020-03-25
Supplement: 12915_2020_766_MOESM10_ESM.pdf [file 12915_2020_766_MOESM10_ESM.pdf]

Additional file 10, Figure S6

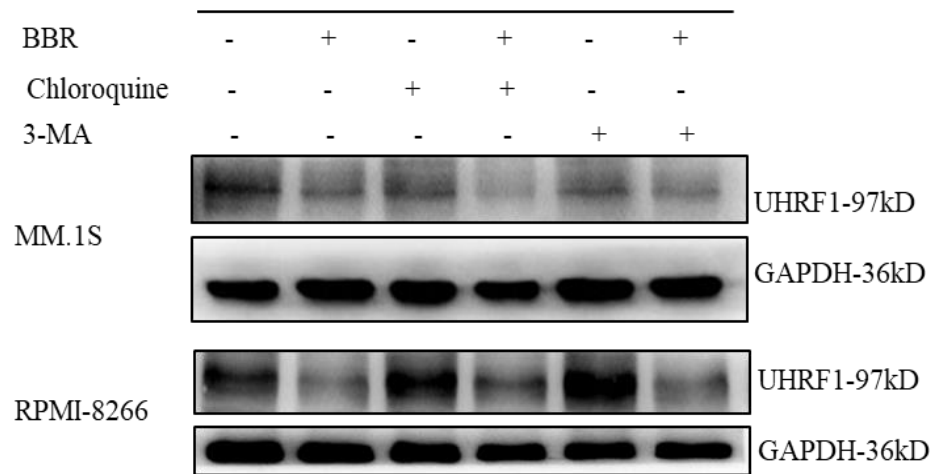

**Additional file 10, Figure S6.** MM.1S and RPMI-8266 cells were treated with lysosome inhibitor (chloroquine 100  $\mu$ M), autophagy inhibitor (3-MA, 25 $\mu$ M) or BBR (25  $\mu$ M) for indicated time. Cells lysates were harvested and subjected to western blotting with the anti-UHRF1 and anti-GAPDH antibodies.
