# Supplementary material for: Identification of berberine as a novel drug for the treatment of multiple myeloma via targeting UHRF1
Source: PubMed Central journal article supplement (PMC7098108; doi:10.1186/s12915-020-00766-8), 2020-03-25
Supplement: 12915_2020_766_MOESM12_ESM.pdf [file 12915_2020_766_MOESM12_ESM.pdf]

Additional file 12, Table S5. Antibodies.

| Reagent or Resource         | Supplier                  | Identifier    |
|-----------------------------|---------------------------|---------------|
| Anit-UHRF1                  | Abcam                     | Cat# ab213223 |
| Anti-DNMT1                  | Cell Signaling Technology | Cat# 5032     |
| Anti-Ubiquitin (fk2)        | Millipore                 | Cat# ST1200   |
| Anti-p53                    | Cell Signaling Technology | Cat# 2524     |
| Anti-p16INK4A               | Cell Signaling Technology | Cat# 80772S   |
| Anti-p73                    | Cell Signaling Technology | Cat# 14620    |
| Anti-rabbit IgG, HRP-linked | Cell Signaling Technology | Cat# 7074S    |
| Anti-rabbit IgG, HRP-linked | Cell Signaling Technology | Cat# 7076S    |
| Anti-GAPDH                  | Cell Signaling Technology | Cat# 2118     |
