# Supplementary material for: Identification of berberine as a novel drug for the treatment of multiple myeloma via targeting UHRF1
Source: PubMed Central journal article supplement (PMC7098108; doi:10.1186/s12915-020-00766-8), 2020-03-25
Supplement: 12915_2020_766_MOESM13_ESM.pdf [file 12915_2020_766_MOESM13_ESM.pdf]

Additional file 13, Table S6. Experimental models

---

| Experimental model | Source                                                   |
|--------------------|----------------------------------------------------------|
| BALB/c nu: female; | Institute of Laboratory Animal Science, Jinan University |
| C57BL/6J           | Institute of Laboratory Animal Science, Jinan University |

---
