# Supplementary material for: Identification of berberine as a novel drug for the treatment of multiple myeloma via targeting UHRF1
Source: PubMed Central journal article supplement (PMC7098108; doi:10.1186/s12915-020-00766-8), 2020-03-25
Supplement: 12915_2020_766_MOESM14_ESM.pdf [file 12915_2020_766_MOESM14_ESM.pdf]

Additional file 14, Table S7. Chemicals, recombinant proteins, and plasmids.

| Chemicals, recombinant proteins, and plasmids | Source                   | Identifier      |
|-----------------------------------------------|--------------------------|-----------------|
| Berberine                                     | Sigma–Aldrich            | S1026           |
| Chloroquine                                   | Sigma–Aldrich            | C6628           |
| 3-MA                                          | Sigma–Aldrich            | M9281           |
| MG-132                                        | Sigma–Aldrich            | M7449           |
| Cycloheximide                                 | MedChem Express          | HY-12320        |
| Bortezomib                                    | MedChem Express          | HY-10227        |
| pCMV3-N-Flag-UHRF1                            | Sino Biological          | HG17896-NF      |
| pRK-5-N-HA-Ubiquitin                          | Miaolinbio               | P1761           |
| LPP-CS-UHRF1-Lv130-01-400                     | GeneCopoeia              | N/A             |
| LPP-CS-NEG-Lv130-100                          | GeneCopoeia              | N/A             |
| Protein A/G PLUS-Agarose                      | Santa Cruz Biotechnology | Sc-2003         |
| Anti-Flag Affinity Gel                        | Bimake                   | B23101          |
| Signal-Seeker™ Ubiquitination Detection Kit   | Cytoskeleton             | BK161           |
| Lymphoprep™                                   | Stem cell                | #07851          |
| 20S Proteasome Activity Assay Kit             | Millipore                | Cat. No. APT280 |
