# Supplementary material for: Identification of berberine as a novel drug for the treatment of multiple myeloma via targeting UHRF1
Source: PubMed Central journal article supplement (PMC7098108; doi:10.1186/s12915-020-00766-8), 2020-03-25
Supplement: 12915_2020_766_MOESM15_ESM.pdf [file 12915_2020_766_MOESM15_ESM.pdf]

Additional file 15, Table S8. Oligonucleotides.

| Oligonucleotide        | Sequence(5' to 3')           | Source                              |
|------------------------|------------------------------|-------------------------------------|
| UHRF1-siRNA #1         |                              | Guangzhou RiboBio Co., Ltd.         |
| Sense                  | CGAGAGCGAGAGAAGGAGAACAGCA tt |                                     |
| Antisense              | UGCUGUUCUCCUUCUCUCGCUCUCG tt |                                     |
| UHRF1-siRNA #2         |                              | Guangzhou RiboBio Co., Ltd.         |
| Sense                  | GAGAGCGAGAGAAGGAGAACAGCAA tt |                                     |
| Antisense              | UUGCUGUUCUCCUUCUCUCGCUCUC tt |                                     |
| UHRF1-siRNA #3         |                              | Guangzhou RiboBio Co., Ltd.         |
| Sense                  | GAGCGAGAGAAGGAGAACAGCAAGA tt |                                     |
| Antisense              | UCUUGCUGUUCUCCUUCUCUCGCUC tt |                                     |
| Negative Control siRNA |                              | Guangzhou RiboBio Co., Ltd.         |
| Sense                  | GAGAGAAAGAGGAAGGACACCGAGA tt |                                     |
| Antisense              | UCUCGGUGUCCUCCUCUUUCUCUC tt  |                                     |
| GAPDH Primers          |                              | Sangon Biotech (Shanghai) Co., Ltd. |
| Forward                | CAACGGATTTGGTCGTATT          |                                     |
| Reverse                | CACAGTCTTCTGGGTGGC           |                                     |
| UHRF1 Primers          |                              | Sangon Biotech (Shanghai) Co., Ltd. |
| Forward                | GGCAAGTGGAAGCGGAAGTCG        |                                     |
| Reverse                | CTTGGCGTTGCTCTTGTCCTCTC      |                                     |
| P16INK4A Primers       |                              | Sangon Biotech (Shanghai) Co., Ltd. |
| Forward                | TCATGATGATGGGCAGCG           |                                     |

|             |                        |                                              |
|-------------|------------------------|----------------------------------------------|
| Reverse     | CATCTATGCGGGCATGGTTA   |                                              |
| <hr/>       |                        |                                              |
| P53 Primers |                        | Sangon<br>Biotech<br>(Shanghai) Co.,<br>Ltd. |
| Forward     | CCAACAACACCAGCTCCTCT   |                                              |
| Reverse     | CAAGGCCTCATTGAGCTCTC   |                                              |
| <hr/>       |                        |                                              |
| P73 Primers |                        | Sangon<br>Biotech<br>(Shanghai) Co.,<br>Ltd. |
| Forward     | CCTTGGTGCCGGTGTGAAGAAG |                                              |
| Reverse     | GCTGCTGCTGCTGCCGATAG   |                                              |
| <hr/>       |                        |                                              |
